# Supplementary material
Source: Research Square preprint supplement (doi:10.21203/rs.3.rs-9925781/v1)
Supplement: Supplementary file 2 [file 7e94c1bb91139884437ab0b0.docx]

**Supplemental table 1**. Analysis of agronomic traits of NJ46 after treatment with TYR1-L strain in pot and field experiments.

|  | Treatment | Plant height (cm) | Effective panicle | Panicle length (cm) | Primary branch | Secondary branch | Single plant weight (g) | Seed-setting rate (%) | 1000-grain weight (g) |
| --- | --- | --- | --- | --- | --- | --- | --- | --- | --- |
| Field trial in 2024 | CK | 118.25±1.71 | 9.50±0.58 | 17.15±0.26 | 13.00±0.00 | 41.25±2.63 | 46.19±1.02 | 77.02±3.62 | 27.41±0.36 |
| TYR1-L | 120.50±1.29 | 9.75±0.50 | 17.30±0.29 | 13.75±0.05 | 43.00±1.63 | 48.87±0.51 | 79.87±1.72 | 27.94±0.65 |
| Pot trial in 2024 | CK | 114.20±3.39 | 10.00±0.82 | 15.60±0.29 | 12.50±0.58 | 38.00±1.41 | 30.59±1.09 | 66.88±2.68 | 22.79±0.49 |
| TYR1-L | 117.80±2.89 | 10.50±1.29 | 16.13±0.44 | 12.75±0.50 | 39.00±2.16 | 31.59±1.04 | 69.74±2.69 | 23.85±0.85 |

**Supplemental table 2**. Primers used in this study.

| **Description** | **Gene name** | **Primer sequence (5’-3’)** |
| --- | --- | --- |
| Fungal signature sequences | ITS-F | TCCGTAGGTGAACCTGCGG |
| ITS-R | TCCTCCGCTTATTGATATGC |
| Full-F | CTTGGTCATTTAGAGGAAGTAA |
| Full-R | TCCTCCGCTTATTGATATGC |
| qRT-PCR | *OsACTIN*-F | TCCGGTGGATCTTCATGCTTACCT |
| *OsACTIN*-R | ATGGACCATTGCGACGAGTCTTCT |
| *OsLOX1*-F | CCAACCAGACAAAGGCAGTA |
| *OsLOX1*-R | GGGAGAACACCCTCAACAATA |
| *OsLOX2*-F | GCATCCCCAACAGCACATC |
| *OsLOX2*-R | AATAAAGATTTGGGAGTGACATATTGG |
| *OsAOS1*-F | CGGGACATGGTGGTGGAGA |
| *OsAOS1*-R | GGAGTCGTATCGGAGGAAGAGC |
| *OsAOS2*-F | TCGTCGGAAGGCTGTTGC |
| *OsAOS2*-R | ACGATTGACGGCGGAGGT |
| *OsAOC*-F | GCCAAGGTGCAGGAGATGTTCG |
| *OsAOC*-R | AGCCGCTTGTCCAGGCTTCC |
| *OsOPR7*-F | GACCGCACTGACGAGTATGGT |
| *OsOPR7*-R | CCACAGCCCTAGTTACCTCAAGTAG |
| *OsP5CS1*-F | TGGAAGTGCTCATACAGATT |
| *OsP5CS1*-R | TGCTTATGCCAACCTCAG |
| *OsP5CS2*-F | ATCGCTATGGAAGTGCACAC |
| *OsP5CS2*-R | TATGCCAACCTCAGCACCTA |
| *OsOAT*-F | AGAAGCTGGGGTAATAATCC |
| *OsOAT*-R | TGCCTAGAATCACCACATCA |
| *OsP5CR*-F | TGGGCTAAGTGGTAGTGGC |
| *OsP5CR*-R | GCACCAAGAACTGTCTGAGA |
| *OsP5CDH*-F | GTCCTTTCCAGGTGGTTACA |
| *OsP5CDH*-R | CCCAAGTACTTCCTGCAGG |
| *OsProDH*-F | GGTTCCAGGTGAGCAAGTA |
| *OsProDH*-R | TCCTTCCGGAGCAGCTGT |
| *OSADC1*-F | ATGTTCCCGATCATCCCAA |
| *OSADC1*-R | AACATGCCGAGGTAGTAGCC |
| *OsARG*-F | AGCACAGAAGAAGGCAAAGA |
| *OsARG*-R | GGATCTTCCTCCATCACTGT |
| *OsODC*-F | CATCCTCATGGACCACTACG |
| *OsODC*-R | TCATCTCCGGCAGCTGGTA |
| *OsDAO4*-F | GGCTCATAATCAGGTGGTTG |
| *OsDAO4*-R | TGTTCCTTACGATCCAATGC |
| *OsPAO4*-F | GGGATCAGGAGCATGTTCTT |
| *OsPAO4*-R | TTACCCTTTGATTAAGCCGG |
| *OsSpdS1*-F | CCCTAGTGGTGTTATTGGTT |
| *OsSpdS1*-R | GCTGAGTGGATCTCGGAATT |
| *OsSpdS2*-F | ATCCTAGTGGTGTCATTGGT |
| *OsSpdS2*-R | CCGATGAACCTCTGAATTGT |
| *OsSpmS2*-F | GTTGGTGATGCTGTGGAGTT |
| *OsSpmS2*-R | TACAAAGAACACCACCAGGC |
| *OsPHT4*-F | TGCTCAAGGACGTGCTGT |
| *OsPHT4*-R | GGCACCAGGAACAGCAT |
| *OsBADH2*-F | TAACTGAGGAGATCGATGCC |
| *OsBADH2*-R | AGTTGTCAATGCCCCCTT |
| *OsSPX2*-F | GGAGGTGAAAACGAGAATGG |
| *OsSPX2*-R | ACAGCAGGTGGGAAACAAAC |
| *OsSPX3*-F | TGCAGTCCATCCGATCCG |
| *OsSPX3*-R | ATGTGTATGTATGTTCTCTACCACG |
| *OsSPX5*-F | CGACGAGCTGCAACATT |
| *OsSPX5*-R | CAAGAACCATTGGTATTGATC |
|  | *OsSPX6*-F | TCTGCGCTGCGAAATCTG |
| *OsSPX6*-R | TTGAAAGCCAAAACACGTATG |
| *OsPT2*-F | GACGAGACCGCCCAAGAAG |
| *OsPT2*-R | TTTTCAGTCACTCACGTCGAGAC |
| *OsPT8*-F | AGAAGGCAAAAGAAATGTGTGTTAAAT |
| *OsPT8*-R | AAAATGTATTCGTGCCAAATTGCT |
| *OsCd1*-F | TCAGCTGCATCACCAAGCACT |
| *OsCd1*-R | TCTCTTGTTGTGCTCCGCGA |
| *OsIRT1*-F | AGGTCGGTGCTCGTCTTCT |
| *OsIRT1*-R | TGTCCCTGTACACCCTGGTC |
| *OsCAL1*-F | AGTCGCGTGTTCTCCTTTGT |
| *OsCAL1*-R | CATGACAGCAGCTTGCAAAT |
| *OsHMA3*-F | TCCATCCAACCAAACCCGGAAA |
| *OsHMA3*-R | TGCCAATGTCCTTCTGTTCCCA |
| *OsNramp1*-F | GGATTCTCCTGGGTGCTGGGGTT |
| *OsNramp1*-R | GCAACAATCTACTCCCATGGGCC |
| *OsNramp5*-F | CAGCAGCAGTAAGAGCAAGATG |
| *OsNramp5*-R | GTGCTCAGGAAGTACATGTTGA |
| *OsYSL15*-F | ACCGGTGTCACTGCTAAGAG |
| *OsYSL15*-R | GGGACAGTACCCCTCTTGAA |
| *OsFRDL1*-F | TCGGAGCATCAGACTACACA |
| *OsFRDL1*-R | CCCATTCCAAGTGCTAGCTA |
| *OsVIT1*-F | GGACACTGAGGCTGCTGAGA |
| *OsVIT1*-R | GCACAGAGAAGCCAACTACG |
| *OsIRO2*-F | GCCGTGTTTTCTCGCTCTAT |
| *OsIRO2*-R | AGACGACCACCACCACACT |
| *OsNAS2*-F | TCAACTCCGTCATCGTCGCT |
| *OsNAS2*-R | CGCACTCAGACGGATAGCCT |
| *OsSOS1*-F | TGTACGGGAGCATGATCAAT |
| *OsSOS1*-R | ACCCTCGGACTGCACAGACA |
| *OsNHX3*-F | TGTATTCCCTTTGTCTTTCTTATCC |
| *OsNHX3*-R | GAAGTGGGTCTATGATTGACTGG |
| *OsBADH1*-F | GCCAGTTTCTTCGAATCCTT |
| *OsBADH1*-R | TTGACCCTCATCCAAAAGCC |
| *OsNCED3*-F | CATCGATCGAACACCTCCAC |
| *OsNCED3*-R | AAAATTGGAAGACCGAGGCT |
| *OsPP2C49*-F | GTCTCGAGCCATCGGGGA |
| *OsPP2C49*-R | GACGACCTCGCACGCCAT |
| *OsTPS1*-F | ACACCGTGAGACATCATTTG |
| *OsTPS1*-R | AATTGCAGCACCCTTTGTAA |
| *OsbZIP23*-F | CGAGAAGGTTGTCGAGAGAA |
| *OsbZIP23*-R | TTTCATCCTGCTTTTTCTGG |
| *OsDREB2A*-F | GCACATCAGCACCTTCATTG |
| *OsDREB2A*-R | CACGTTCCAACACATCCTTC |
| *OsACTIN*-F | CAACACCCCTGCTATGTACG |
| *OsACTIN*-R | CATCACCAGAGTCCAACACAA |
